# Supplementary material
Source: publisher figshare collection journal article supplement (https://tandf.figshare.com/articles/dataset/_/24593125)
Supplement: Supplementary file 2 [file 1]

# Replication Files for “Minimum Resource Threshold Policy Under Partial Interference”

This supplementary file contains replication codes for “Minimum Resource Threshold Policy Under Partial Interference.”

## 1 Software and Packages

- Software: R version 4.2.1
- Packages: caret (version 6.0.93); dplyr (version 1.1.2); earth (version 5.3.1); GADMTTools (version 3.9.1); gam (version 1.22); gbm (version 2.1.8.1); ggplot2 (version 3.4.2); ggpubr (version 0.5.0); glmnet (version 4.1.6); grid (version 4.2.1); gridExtra (version 2.3); gtools (version 3.9.4); kernlab (version 0.9.32); KernSmooth (version 2.23.20); lattice (version 0.20.45); maps (version 3.4.1); MASS (version 7.3.58.2); nnet (version 7.3.18); np (version 0.60.16); polyspline (version 1.1.22); ranger (version 0.14.1); RcolorBrewer (version 1.1.3); rgdal (version 1.6.4); SuperLearner (version 2.0.28); xgboost (version 1.7.3.1); readstata13 (version 0.10.0)

## 2 Common Code Files

- MySL.R contains functions used for implementing superlearner algorithm and estimating the nuisance functions.
- OptTrt\_Sim\_Function.R contains functions used for the MRTR using the direct and indirect approaches.

## 3 Data Folder

Data folder contains replication files for the data analysis in Section 5 of the paper.

### 3.1 Download the DHS data

- The dataset can be downloaded by following the steps below:
  - Request dataset access by following the instructions at <https://dhsprogram.com/data/Access-Instructions.cfm>.

- Download SNKR70FL.ZIP from [https://dhsprogram.com/data/dataset/Senegal\\_Continuous-DHS\\_2014.cfm?flag=1](https://dhsprogram.com/data/dataset/Senegal_Continuous-DHS_2014.cfm?flag=1).
  - Download SNKR7HFL.ZIP from [https://dhsprogram.com/data/dataset/Senegal\\_Continuous-DHS\\_2015.cfm?flag=1](https://dhsprogram.com/data/dataset/Senegal_Continuous-DHS_2015.cfm?flag=1).
  - Download SNKR7IFL.ZIP from [https://dhsprogram.com/data/dataset/Senegal\\_Continuous-DHS\\_2016.cfm?flag=1](https://dhsprogram.com/data/dataset/Senegal_Continuous-DHS_2016.cfm?flag=1).
  - Download SNKR7ZFL.ZIP from [https://dhsprogram.com/data/dataset/Senegal\\_Continuous-DHS\\_2017.cfm?flag=1](https://dhsprogram.com/data/dataset/Senegal_Continuous-DHS_2017.cfm?flag=1).
  - Download SNKR81FL.ZIP from [https://dhsprogram.com/data/dataset/Senegal\\_Continuous-DHS\\_2018.cfm?flag=1](https://dhsprogram.com/data/dataset/Senegal_Continuous-DHS_2018.cfm?flag=1).
  - Unzip the above zip files, and obtain SNKR70FL.DTA, SNKR7HFL.DTA, SNKR7IFL.DTA, SNKR7ZFL.DTA, SNKR81FL.DTA.
- Place the datasets in the following paths.
    - Data/DHS/2014/SNKR70FL.DTA
    - Data/DHS/2015/SNKR7HFL.DTA
    - Data/DHS/2016/SNKR7IFL.DTA
    - Data/DHS/2017/SNKR7ZFL.DTA
    - Data/DHS/2018/SNKR81FL.DTA
  - Download “SNGE81FL.ZIP” from [https://dhsprogram.com/data/dataset/Senegal\\_Continuous-DHS\\_2018.cfm?flag=1](https://dhsprogram.com/data/dataset/Senegal_Continuous-DHS_2018.cfm?flag=1).
  - Unzip the zip file and place the 10 files below in “Data/GPS\_2018” folder: DHS\_README.txt, GPS\_Displacement\_README.txt, SNGE81FL.cpg, SNGE81FL.dbf, SNGE81FL.prj, SNGE81FL.sbn, SNGE81FL.sbx, SNGE81FL.shp, SNGE81FL.shp.xml, SNGE81FL.shx.

## 3.2 Code

- Step1\_Cleaning.R
  - The DHS datasets are cleaned.
  - The training and test datasets are saved as “Sen\_Training\_1417.csv” and “Sen\_Test\_18.csv”, respectively.
  - The test set including the identifier is saved as “TestSetID.csv”.
- Step2\_MakeSplittingID.R
  - Cross-fitting sets are saved in SAM\_IND.csv and SS\_IND.csv
- Step3\_Direct\_NF\_Estimation.R

- The outcome regressions and propensity scores are estimated.
- The results are saved as “NF\_SS###\_ES###.csv” and “PS\_SS###\_ES###.csv” files in “NF” folder.
- This step will take a lot of time, so it is recommended to use parallel computing.
- Step4\_Direct\_NF\_Merge.R
  - Files obtained in Step 3 are merged.
  - The results are saved as “NF\_SS###.csv” and “PS\_SS###.csv” files in “NF” folder.
- Step5\_Direct\_OV\_InitialPoints.R and Step5\_Direct\_SO\_InitialPoints.R
  - The initial values for the DC algorithm are evaluated.
  - The results are saved as “Starting\_B#####.csv” files in “Overall/Starting” and “Spillover-all/Starting” folders.
- Step6\_Direct\_OV\_InitialPoints\_Adjustment.R and Step6\_Direct\_SO\_InitialPoints\_Adjustment.R
  - Adjust the initial points obtained in the Step 5 R files.
  - The results are saved as “NF\_Train\_Adj\_B#####.csv” files in “Overall/NF\_New\_Adj” and “Spilloverall/NF\_New\_Adj” folders.
- Step7\_Direct\_OV\_SVMPParameter.R and Step7\_Direct\_SO\_SVMPParameter.R
  - The empirical risks under each parameter are evaluated.
  - The results are saved as “CV\_OV\_S#####.csv” files in “Overall/CV” and “Spilloverall/CV” folders.
  - This step will take a lot of time, so it is recommended to use parallel computing.
- Step8\_Direct\_OV\_TrainingsetRule.R and Step8\_Direct\_SO\_TrainingsetRule.R
  - MRTR estimates obtained from the direct approach for the training sets are obtained where parameters are chosen from CV.
  - The results are saved as “RULE\_S#####.csv” files in “Overall/RULE” and “Spilloverall/RULE” folders.
  - This step will take a lot of time, so it is recommended to use parallel computing.
- Step9\_Direct\_OV\_TestsetRule.R and Step9\_Direct\_SO\_TestsetRule.R
  - MRTR estimates obtained from the direct approach for the test sets are obtained where parameters are chosen from CV.
  - The results are saved as “RULE\_S#####-Test.csv” files in “Overall/RULE” and “Spilloverall/RULE” folders.

- Step10\_Indirect\_Estimation.R
  - MRTR estimates obtained from the indirect approach for the test sets are obtained where parameters are chosen from CV.
  - The results are saved as “RULE\_LR\_Test.csv” files in “Overall/NF\_LR” and “Spilloverall/NF\_LR” folders.
- Step11\_Summary\_GeoRegion.R
  - The simulation results are merged with GPS file “Data/GPS\_2018/SNGE81FL.shp”
  - The summary is saved as “Overall/RULE\_Merged.csv” and “Spilloverall/RULE\_Merged.csv”.
- Step12\_CheckAssumptions.R
  - The assumptions are assessed as in Section 5.2.
- Step13\_Summary.R
  - The simulation results are summarized and the plots are drawn.

### 3.3 Folder

- Data: this folder contains the cleaned datasets used in the analysis.
- Data.Original: this folder contains 2014-2018 Senegal DHS datasets and the GPS information of 2018 Senegal DHS dataset.
- NF: this folder contains the estimated outcome regression and propensity score by aggregating the files in NF\_Raw folder.
- NF\_LR: this folder contains MRTR estimates obtained from the indirect approach.
- NF\_Raw: this folder contains the estimated outcome regression and propensity score obtained from undersampling.
- Overall: this folder contains the results related to the overall MRTR estimation.
- plot: this folder contains the graphical summaries of the data analysis and the assessment of the assumptions.
- Spilloverall: this folder contains the results related to the spilloverall MRTR estimation.
- SplittingID: this folder contains the indices of cross-fitting procedure.

## 4 Simulation Folder

Simulation folder contains replication files for the simulation in Section 4 of the paper.

## 4.1 Code

- Step1\_DGP.R
  - The datasets used for the simulation are generated.
- Step2\_Direct\_NF\_Estimation.R
  - The outcome regressions and propensity scores are estimated.
  - The results are saved as “NF\_TT###\_SS###\_ES###.csv” files in “NF\_Raw” folder.
  - This step will take a lot of time, so it is recommended to use parallel computing.
- Step3\_Direct\_NF\_Merge.R
  - Files obtained in Step 3 are merged.
  - The results are saved as “NF\_TT###\_SS###.csv” files in “NF” folder.
- Step4\_Direct\_InitialPoints.R
  - The initial values for the DC algorithm are evaluated.
  - The results are saved as “Starting\_TT###\_SS###.csv” files in “Starting” folder.
- Step5\_Direct\_InitialPoints\_Adjustment.R
  - Adjust the initial points obtained in the Step 4 R file.
  - The results are saved as “NF\_Train\_Adj\_TT###\_SS###.csv” files in “NF” folder.
- Step6\_Direct\_SVMPParameter.R
  - The empirical risks under each parameter are evaluated.
  - The results are saved as “CV\_TT.S###.csv” files in “CV” folder.
  - This step will take a lot of time, so it is recommended to use parallel computing.
- Step7\_Direct\_TrainingsetRule.R
  - MRTR estimates obtained from the direct approach for the training sets are obtained where parameters are chosen from CV.
  - The results are saved as “RULE\_TT###\_S###.csv” files in “RULE” folder.
  - This step will take a lot of time, so it is recommended to use parallel computing.
- Step8\_Direct\_TestsetRule.R
  - MRTR estimates obtained from the direct approach for the test sets are obtained where parameters are chosen from CV.
  - The results are saved as “RULE\_TT###\_S###\_Test.csv” files in “RULE” folder.

- Step9\_Indirect\_Estimation.R
  - MRTR estimates obtained from the indirect approach for the test sets are obtained where parameters are chosen from CV.
  - The results are saved as “LR\_OR\_Test\_TT###.csv” and “RULE\_LR\_Test\_TT###.csv” files in “Indirect” folder.
- Step10\_Summary.R
  - The simulation results are summarized.

## 4.2 Folder

- CV: this folder contains cross-validation results.
- Data: this folder contains the datasets generated from the simulation scenario.
- Indirect: this folder contains the result of the MRTR estimation using the indirect approaches.
- NF: this folder contains the estimated outcome regression and propensity score by aggregating the files in NF\_Raw folder.
- NF\_Raw: this folder contains the estimated outcome regression and propensity score obtained from undersampling.
- RULE: this folder contains the result of the MRTR estimation using the direct approaches.
- plot: plot folder contains the graphical summaries of the data analysis and the assessment of the assumptions.
- Starting and Starting\_Raw: these folders contain the initial points for the empirical risk minimization.
